# Supplementary material for: Dietary Patterns and Long-Term Outcomes in Patients with NAFLD: A Prospective Analysis of 128,695 UK Biobank Participants
Source: MDPI journal article supplement (doi:10.3390/nu15020271), 2023-01-05
Supplement: s1 [file s1]

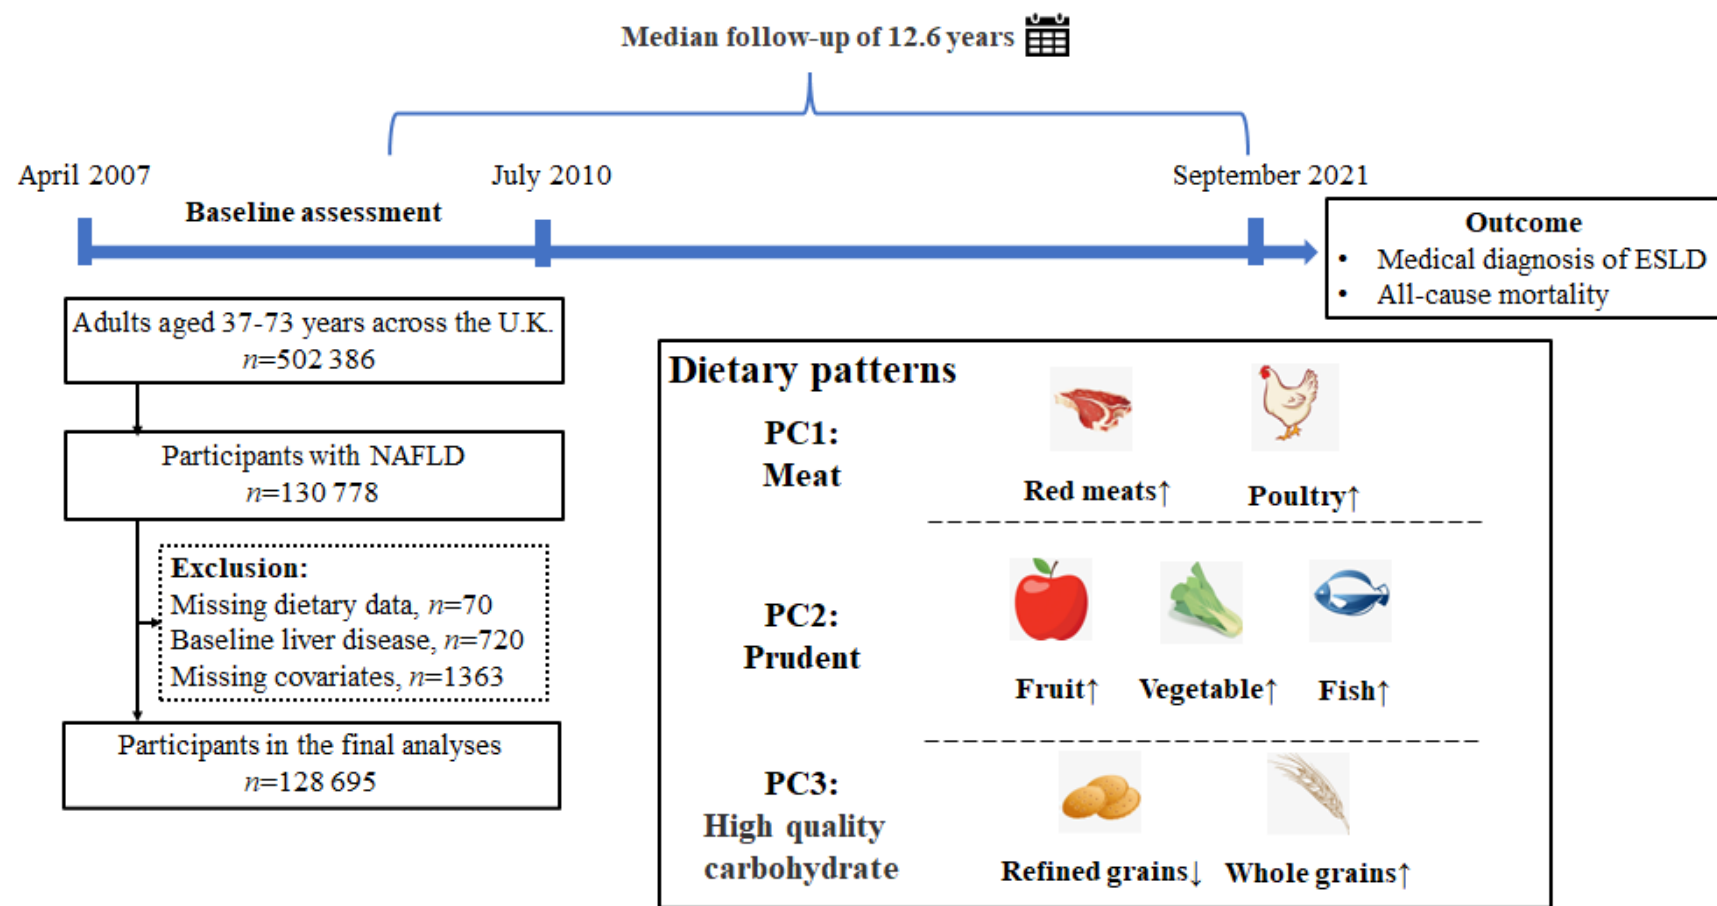

Supplementary Figure S1. Summary of study design and analytical strategy.

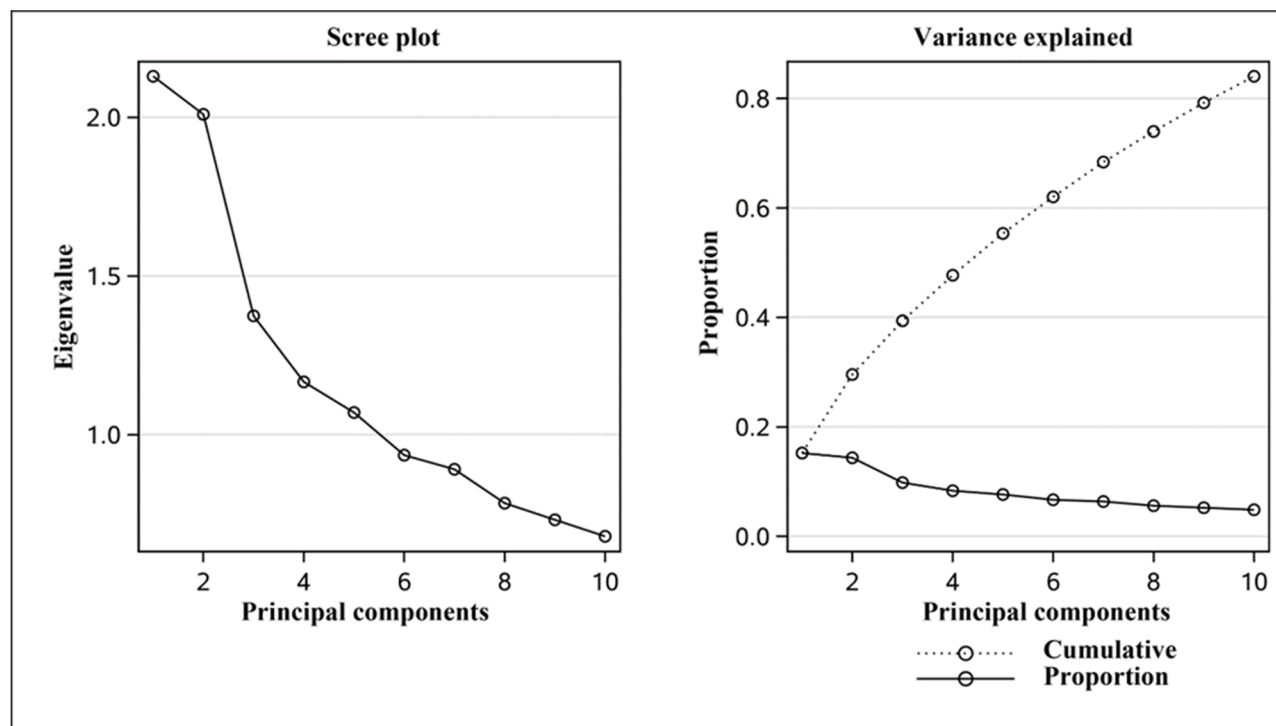

Supplementary Figure S2. Scree plot of the factor analysis.

**Supplementary Table S1.** Components and scaling methods of diet quality score used in the UK Biobank study

| <b>Components</b> | <b>Field IDs</b>                                      | <b>Amount per serving</b>                            | <b>Criteria for maximum score (10)</b> | <b>Criteria for minimum score (0)</b> |
|-------------------|-------------------------------------------------------|------------------------------------------------------|----------------------------------------|---------------------------------------|
| Fruit             | 1309 (pieces fresh fruit/day)                         | 1309 – 1 piece                                       | $\geq 3$ servings/day                  | 0 servings/day                        |
|                   | 1319 (pieces dried fruit/day)                         | 1319 – 5 pieces                                      |                                        |                                       |
| Vegetable         | 1289 (tablespoons cooked vegetables/day)              | 3 heaped tablespoons                                 | $\geq 3$ servings/day                  | 0 servings/day                        |
|                   | 1299 (salad/raw vegetables/day)                       |                                                      |                                        |                                       |
| Whole grains      | 1438, 1448 (whole meal/whole grain bread slices/week) | 1438/1448 – 1 slice/day                              | $\geq 3$ servings/day                  | 0 servings/day                        |
|                   | 1458, 1468 (bran/oat/muesli cereal bowls/week)        | 1458/1468 – 1 bowl/day                               |                                        |                                       |
|                   |                                                       |                                                      |                                        |                                       |
| Fish              | 1329 (oily fish/week)                                 | Once/week                                            | $\geq 2$ servings/week                 | 0 servings/week                       |
|                   | 1339 (non-oily fish/week)                             |                                                      |                                        |                                       |
| Dairy             | 1408 (cheese/week)                                    | 1408 – 1 piece/day                                   | $\geq 2$ servings/day                  | 0 servings/day                        |
|                   | 1418 (milk type)                                      | 1418 – 1 glass/day if consumption of anytype of milk |                                        |                                       |

|                           |                                                                                                                                                                                                                 |                                                                                   |                       |                 |
|---------------------------|-----------------------------------------------------------------------------------------------------------------------------------------------------------------------------------------------------------------|-----------------------------------------------------------------------------------|-----------------------|-----------------|
| Vegetable oils            | 1428 (Flora Pro-Active/Benecol spread)<br>2654 (Flora Pro-Active/Benecol, soft margarine -, olive oil based -, polyunsaturated/sunflower oil based -, other low/reduced fat spread)<br>1438 (bread slices/week) | 1 serving/day if in combination with eating at least 2 slices of bread (ID 1438)  | $\geq 2$ servings/day | 0 servings/day  |
| Refined grains            | 1438<br>1448 (white, brown, other bread slices/week)<br>1458<br>1468 (biscuit, other cereals/week)                                                                                                              | 1438/1448 – 1 slice/day<br>1458/1468 – 1 bowl/day                                 | 0 servings/day        | >2 servings/day |
| Processed meats           | 1349 (processed meat/week or daily)<br>3680(age when last ate meat)                                                                                                                                             | 1349 – 1 piece/day<br>3680 – 0 pieces/day if indicated having never eaten meat    | 0 serving/week        | >1 serving/week |
| Unprocessed red meats     | 1369 (beef/week or day)<br>1379 (lamb or mutton/week or day)<br>1389(pork/week or day)<br>3680 (age when last ate meat)                                                                                         | 1359-1389 – once/week<br>3680 – 0 pieces/day if indicated having never eaten meat | 0 serving/week        | >2 serving/week |
| Sugar-sweetened beverages | 6144 (never consumes drinks containingsugar)                                                                                                                                                                    | 0 servings                                                                        | Don't drink           | Drink           |

Zhuang, P., Liu, X., Li, Y., Wan, X., Wu, Y., Wu, F., ... Jiao, J.. (2021). Effect of Diet Quality and Genetic Predisposition on Hemoglobin A1c and Type 2 Diabetes Risk: Gene-Diet Interaction Analysis of 357,419 Individuals.doi:10.2337/figshare.15085239.v1

**Supplementary Table S2. PCA -derived dietary patterns and their factor loadings**

| Food items            | Dietary patterns |          |                           |
|-----------------------|------------------|----------|---------------------------|
|                       | Meat             | Prudent  | High quality carbohydrate |
| Cooked vegetable      | 0.01949          | 0.65704  | -0.10995                  |
| Salad / raw vegetable | -0.06781         | 0.69771  | -0.10208                  |
| Fresh fruit           | -0.09319         | 0.57226  | 0.05454                   |
| Dried fruit           | -0.08238         | 0.39036  | 0.11591                   |
| Oily fish             | 0.19224          | 0.49596  | 0.24435                   |
| Non-oily fish         | 0.28878          | 0.39028  | 0.16236                   |
| Processed meat        | 0.55157          | -0.22960 | -0.11822                  |
| Poultry               | 0.49302          | 0.13188  | 0.05392                   |
| Beef                  | 0.67182          | -0.06005 | -0.04359                  |
| Lamb/mutton           | 0.63600          | 0.08068  | -0.01525                  |
| Pork                  | 0.67022          | -0.01353 | -0.00354                  |
| Cheese                | 0.13109          | -0.07946 | 0.11892                   |
| Refined grains*       | 0.10574          | -0.13497 | -0.83423                  |
| Whole grains*         | -0.02567         | 0.07911  | 0.85407                   |
| Explained variance, % | 15.21            | 29.56    | 39.38                     |

Food items were standardized and included in the principal component analysis (PCA) with varimax rotation. Rotated factor loadings with an absolute value  $\geq |0.30|$  were considered to significantly contribute to the dietary pattern and colored red.

\* The definitions of refined grains and whole grains were based on the criteria in Supplementary Table S1.

**Supplementary Table S3. Criteria for the ESLD, CVD, Cancer**

| End stage liver disease |                                                                    | CVD death |                                                    | Liver death         |                                           |
|-------------------------|--------------------------------------------------------------------|-----------|----------------------------------------------------|---------------------|-------------------------------------------|
| Code                    | Description                                                        | Code      | Description                                        | Code                | Description                               |
| K74.6                   | Other and unspecified cirrhosis of liver                           | I20       | Angina pectoris                                    | K70                 | Alcoholic liver disease                   |
| K76.6                   | Portal hypertension                                                | I21       | Acute myocardial infarction                        | K71                 | Toxic liver disease                       |
| K76.7                   | Hepatorenal syndrome                                               | I25       | Chronic ischaemic heart disease                    | K72                 | Hepatic failure, not elsewhere classified |
| I85.0                   | Oesophageal varices with bleeding                                  | I48       | Atrial fibrillation and flutter                    | K74                 | Fibrosis and cirrhosis of liver           |
| I85.9                   | Oesophageal varices without bleeding                               | I50       | Heart failure                                      | K75                 | Other inflammatory liver diseases         |
| I86.4                   | Gastric varices                                                    | I60       | Subarachnoid haemorrhage                           | K76                 | Other diseases of liver                   |
| I98.2                   | Oesophageal varices in diseases classified elsewhere               | I61       | Intracerebral haemorrhage                          |                     |                                           |
| I98.3                   | Oesophageal varices with bleeding in diseases classified elsewhere | I63       | Cerebral infarction                                | <b>Cancer death</b> |                                           |
| R18                     | Ascites                                                            | I64       | Stroke, not specified as haemorrhage or infarction | C00-C97             | Malignant neoplasms                       |
| Z94.4                   | Liver transplant                                                   |           |                                                    |                     |                                           |
| C22.0                   | Liver cell carcinoma                                               |           |                                                    |                     |                                           |

**Supplementary Table S4. HRs of cause-specific mortality for quintiles of diet quality score (n=128 549)**

| Diet quality score | Liver            |                |                           | CVD              |                |                           | Cancer           |                |                           |
|--------------------|------------------|----------------|---------------------------|------------------|----------------|---------------------------|------------------|----------------|---------------------------|
|                    | HR (95% CI)      | <i>P</i> value | <i>P</i> <sub>trend</sub> | HR (95% CI)      | <i>P</i> value | <i>P</i> <sub>trend</sub> | HR (95% CI)      | <i>P</i> value | <i>P</i> <sub>trend</sub> |
| <b>Model 1</b>     |                  |                | 0.145                     |                  |                | 0.142                     |                  |                | 0.005                     |
| Q1                 | 1 (ref)          |                |                           | 1 (ref)          |                |                           | 1 (ref)          |                |                           |
| Q2                 | 0.80 (0.51–1.25) | 0.324          |                           | 0.99 (0.88–1.10) | 0.811          |                           | 0.92 (0.85–1.00) | 0.045          |                           |
| Q3                 | 0.78 (0.49–1.23) | 0.279          |                           | 0.97 (0.87–1.09) | 0.620          |                           | 0.95 (0.87–1.03) | 0.176          |                           |
| Q4                 | 0.76 (0.48–1.22) | 0.253          |                           | 0.84 (0.75–0.95) | 0.004          |                           | 0.91 (0.84–0.99) | 0.020          |                           |
| Q5                 | 0.70 (0.44–1.12) | 0.132          |                           | 0.98 (0.87–1.09) | 0.670          |                           | 0.88 (0.81–0.96) | 0.003          |                           |
| <b>Model2</b>      |                  |                | 0.009                     |                  |                | 0.001                     |                  |                | <0.001                    |
| Q1                 | 1 (ref)          |                |                           | 1 (ref)          |                |                           | 1 (ref)          |                |                           |
| Q2                 | 0.75 (0.48–1.17) | 0.206          |                           | 0.96 (0.86–1.07) | 0.483          |                           | 0.91 (0.84–0.99) | 0.029          |                           |
| Q3                 | 0.67 (0.42–1.06) | 0.086          |                           | 0.93 (0.83–1.04) | 0.201          |                           | 0.94 (0.86–1.01) | 0.105          |                           |
| Q4                 | 0.66 (0.42–1.06) | 0.085          |                           | 0.80 (0.71–0.90) | <0.001         |                           | 0.89 (0.82–0.97) | 0.008          |                           |
| Q5                 | 0.53 (0.33–0.85) | 0.009          |                           | 0.88 (0.78–0.98) | 0.021          |                           | 0.85 (0.79–0.93) | <0.001         |                           |

Model 1 was adjusted for age, sex, ethnicity, Townsend deprivation index (quintiles), education level (university/college degree or others), and household income (less than £18,000, £18,000 to £30,999, £31,000 to £51,999, £52,000 to £100,000, greater than £100,000, or do not know/prefer not to answer).

Model 2 was adjusted for model 1 plus self-reported smoking status (never, former or current smoker), sedentary behavior, body mass index, baseline diabetes, baseline hypertension, serum alanine aminotransferase, triglycerides, and cholesterol.

**Supplementary Table S5. HRs of cause-specific mortality for quintiles of dietary patterns**

| Dietary pattern                  | Liver            |                |                           | CVD              |                |                           | Cancer           |                |                           |
|----------------------------------|------------------|----------------|---------------------------|------------------|----------------|---------------------------|------------------|----------------|---------------------------|
|                                  | HR (95% CI)      | <i>P</i> value | <i>P</i> <sub>trend</sub> | HR (95% CI)      | <i>P</i> value | <i>P</i> <sub>trend</sub> | HR (95% CI)      | <i>P</i> value | <i>P</i> <sub>trend</sub> |
| <b>Meat</b>                      |                  |                | 0.909                     |                  |                | 0.861                     |                  |                | 0.008                     |
| Q1                               | 1.25 (0.74–2.09) | 0.404          |                           | 1.18 (1.04–1.33) | 0.017          |                           | 0.98 (0.89–1.07) | 0.940          |                           |
| Q2                               | 1.06 (0.62–1.80) | 0.833          |                           | 1.10 (0.97–1.24) | 0.268          |                           | 1.09 (1.00–1.19) | 0.050          |                           |
| Q3                               | 1 (ref)          |                |                           | 1 (ref)          |                |                           | 1 (ref)          |                |                           |
| Q4                               | 1.24 (0.75–2.06) | 0.399          |                           | 1.12 (0.99–1.26) | 0.058          |                           | 1.07 (0.98–1.16) | 0.133          |                           |
| Q5                               | 1.16 (0.70–1.91) | 0.568          |                           | 1.11 (0.98–1.25) | 0.072          |                           | 1.12 (1.03–1.21) | 0.002          |                           |
| <b>Prudent</b>                   |                  |                | 0.047                     |                  |                | 0.425                     |                  |                | 0.077                     |
| Q1                               | 1 (ref)          |                |                           | 1 (ref)          |                |                           | 1 (ref)          |                |                           |
| Q2                               | 0.69 (0.44–1.09) | 0.116          |                           | 1.00 (0.89–1.12) | 0.960          |                           | 0.96 (0.88–1.04) | 0.286          |                           |
| Q3                               | 0.55 (0.34–0.90) | 0.017          |                           | 0.95 (0.84–1.07) | 0.389          |                           | 0.97 (0.89–1.05) | 0.401          |                           |
| Q4                               | 0.59 (0.37–0.94) | 0.027          |                           | 0.88 (0.78–0.99) | 0.039          |                           | 0.89 (0.82–0.97) | 0.009          |                           |
| Q5                               | 0.65 (0.41–1.03) | 0.065          |                           | 1.00 (0.89–1.13) | 0.969          |                           | 0.95 (0.87–1.03) | 0.208          |                           |
| <b>High quality carbohydrate</b> |                  |                | 0.002                     |                  |                | 0.001                     |                  |                | 0.044                     |
| Q1                               | 1 (ref)          |                |                           | 1 (ref)          |                |                           | 1 (ref)          |                |                           |
| Q2                               | 0.81 (0.53–1.25) | 0.347          |                           | 0.89 (0.80–0.99) | 0.037          |                           | 1.02 (0.94–1.10) | 0.653          |                           |
| Q3                               | 0.74 (0.47–1.16) | 0.189          |                           | 0.84 (0.75–0.95) | 0.004          |                           | 0.95 (0.87–1.03) | 0.226          |                           |
| Q4                               | 0.58 (0.36–0.95) | 0.029          |                           | 0.78 (0.69–0.87) | <0.001         |                           | 0.93 (0.85–1.01) | 0.086          |                           |
| Q5                               | 0.50 (0.31–0.81) | 0.005          |                           | 0.84 (0.75–0.93) | 0.002          |                           | 0.95 (0.88–1.03) | 0.217          |                           |

Model was adjusted for age, sex, ethnicity, Townsend deprivation index (quintiles), education level (university/college degree or others), household income (less than £18,000, £18,000 to £30,999, £31,000 to £51,999, £52,000 to £100,000, greater than £100,000, or do not know/prefer not to answer), self-reported smoking status (never, former or current smoker), sedentary behavior, body mass index, baseline diabetes, baseline hypertension, serum alanine aminotransferase, triglycerides, and cholesterol.



**Supplementary Table S6. Subgroup analyses in diet quality and ESLD**

| Subgroups                 | Q1      | Q2               | Q3               | Q4               | Q5               | <i>P</i> <sub>interaction</sub> |
|---------------------------|---------|------------------|------------------|------------------|------------------|---------------------------------|
| <b>Gender</b>             |         |                  |                  |                  |                  | 0.725                           |
| Male                      | 1 (ref) | 0.90 (0.72–1.12) | 0.69 (0.55–0.87) | 0.73 (0.58–0.91) | 0.78 (0.63–0.97) |                                 |
| Female                    | 1 (ref) | 0.97 (0.82–1.15) | 0.95 (0.80–1.13) | 0.93 (0.78–1.11) | 0.74 (0.61–0.89) |                                 |
| <b>Age</b>                |         |                  |                  |                  |                  | 0.163                           |
| ≤60 years                 | 1 (ref) | 1.04 (0.84–1.29) | 0.89 (0.71–1.11) | 0.92 (0.73–1.16) | 0.87 (0.68–1.10) |                                 |
| >60 years                 | 1 (ref) | 0.90 (0.75–1.06) | 0.81 (0.68–0.96) | 0.80 (0.67–0.96) | 0.72 (0.61–0.86) |                                 |
| <b>Townsend index</b>     |         |                  |                  |                  |                  | 0.065                           |
| Below median              | 1 (ref) | 1.03 (0.83–1.28) | 0.87 (0.70–1.09) | 0.89 (0.71–1.11) | 0.88 (0.71–1.10) |                                 |
| Above median              | 1 (ref) | 0.92 (0.77–1.09) | 0.84 (0.70–1.01) | 0.84 (0.70–1.00) | 0.70 (0.58–0.84) |                                 |
| <b>Education level</b>    |         |                  |                  |                  |                  | 0.076                           |
| Others                    | 1 (ref) | 0.90 (0.78–1.04) | 0.78 (0.67–0.91) | 0.81 (0.69–0.94) | 0.74 (0.63–0.86) |                                 |
| College                   | 1 (ref) | 1.43 (0.97–2.09) | 1.32 (0.90–1.93) | 1.24 (0.86–1.81) | 1.12 (0.77–1.63) |                                 |
| <b>Smoking</b>            |         |                  |                  |                  |                  | 0.981                           |
| Current or previous       | 1 (ref) | 0.95 (0.80–1.13) | 0.82 (0.68–0.98) | 0.88 (0.73–1.06) | 0.76 (0.63–0.91) |                                 |
| Never                     | 1 (ref) | 0.95 (0.77–1.17) | 0.87 (0.71–1.08) | 0.82 (0.66–1.01) | 0.79 (0.63–0.97) |                                 |
| <b>Sedentary behavior</b> |         |                  |                  |                  |                  | 0.993                           |
| No                        | 1 (ref) | 0.94 (0.78–1.13) | 0.87 (0.72–1.06) | 0.90 (0.75–1.10) | 0.77 (0.63–0.94) |                                 |
| Yes                       | 1 (ref) | 0.97 (0.80–1.18) | 0.82 (0.67–1.00) | 0.81 (0.66–1.00) | 0.79 (0.65–0.96) |                                 |
| <b>Obesity</b>            |         |                  |                  |                  |                  | 0.161                           |
| No                        | 1 (ref) | 0.97 (0.74–1.27) | 0.97 (0.74–1.28) | 0.96 (0.73–1.27) | 0.85 (0.64–1.13) |                                 |
| Yes                       | 1 (ref) | 0.95 (0.81–1.11) | 0.81 (0.69–0.95) | 0.82 (0.70–0.96) | 0.75 (0.64–0.89) |                                 |
| <b>Hypertension</b>       |         |                  |                  |                  |                  | 0.691                           |
| No                        | 1 (ref) | 0.95 (0.71–1.27) | 0.76 (0.56–1.04) | 0.89 (0.66–1.20) | 0.75 (0.55–1.03) |                                 |
| Yes                       | 1 (ref) | 0.95 (0.82–1.11) | 0.86 (0.74–1.01) | 0.84 (0.72–0.98) | 0.78 (0.66–0.91) |                                 |
| <b>Diabetes</b>           |         |                  |                  |                  |                  | 0.760                           |
| No                        | 1 (ref) | 0.93 (0.80–1.08) | 0.83 (0.71–0.97) | 0.83 (0.71–0.98) | 0.75 (0.64–0.89) |                                 |
| Yes                       | 1 (ref) | 1.02 (0.78–1.34) | 0.88 (0.66–1.17) | 0.90 (0.68–1.19) | 0.82 (0.63–1.07) |                                 |

Model was fully adjusted

**Supplementary Table S7. Subgroup analyses in diet quality and all-cause mortality**

| Subgroups                 | Q1      | Q2               | Q3               | Q4               | Q5               | <i>P</i> <sub>interaction</sub> |
|---------------------------|---------|------------------|------------------|------------------|------------------|---------------------------------|
| <b>Gender</b>             |         |                  |                  |                  |                  | 0.533                           |
| Male                      | 1 (ref) | 0.98 (0.88–1.08) | 0.92 (0.83–1.02) | 0.90 (0.81–1.00) | 0.90 (0.82–1.00) |                                 |
| Female                    | 1 (ref) | 0.93 (0.87–0.99) | 0.93 (0.87–0.99) | 0.84 (0.78–0.90) | 0.84 (0.78–0.90) |                                 |
| <b>Age</b>                |         |                  |                  |                  |                  | 0.089                           |
| ≤60 years                 | 1 (ref) | 1.00 (0.90–1.11) | 0.97 (0.87–1.07) | 0.96 (0.86–1.06) | 0.92 (0.83–1.03) |                                 |
| >60 years                 | 1 (ref) | 0.92 (0.86–0.98) | 0.90 (0.84–0.96) | 0.82 (0.77–0.88) | 0.83 (0.78–0.89) |                                 |
| <b>Townsend index</b>     |         |                  |                  |                  |                  | 0.059                           |
| Below median              | 1 (ref) | 0.96 (0.88–1.05) | 0.91 (0.84–1.00) | 0.90 (0.82–0.98) | 0.88 (0.81–0.96) |                                 |
| Above median              | 1 (ref) | 0.94 (0.88–1.01) | 0.94 (0.87–1.01) | 0.83 (0.77–0.90) | 0.85 (0.79–0.91) |                                 |
| <b>Education level</b>    |         |                  |                  |                  |                  | 0.837                           |
| Others                    | 1 (ref) | 0.95 (0.90–1.01) | 0.93 (0.88–0.99) | 0.87 (0.81–0.92) | 0.86 (0.81–0.92) |                                 |
| College                   | 1 (ref) | 0.92 (0.79–1.06) | 0.88 (0.76–1.02) | 0.82 (0.71–0.94) | 0.82 (0.72–0.95) |                                 |
| <b>Smoking</b>            |         |                  |                  |                  |                  | <0.001                          |
| Current or previous       | 1 (ref) | 0.93 (0.87–1.00) | 0.89 (0.83–0.95) | 0.80 (0.74–0.86) | 0.82 (0.76–0.88) |                                 |
| Never                     | 1 (ref) | 0.98 (0.89–1.08) | 1.00 (0.91–1.10) | 0.97 (0.89–1.07) | 0.94 (0.86–1.04) |                                 |
| <b>Sedentary behavior</b> |         |                  |                  |                  |                  | 0.735                           |
| No                        | 1 (ref) | 0.95 (0.88–1.03) | 0.92 (0.85–0.99) | 0.86 (0.79–0.93) | 0.87 (0.80–0.94) |                                 |
| Yes                       | 1 (ref) | 0.94 (0.87–1.02) | 0.93 (0.86–1.01) | 0.86 (0.80–0.94) | 0.85 (0.79–0.92) |                                 |
| <b>Obesity</b>            |         |                  |                  |                  |                  | 0.427                           |
| No                        | 1 (ref) | 0.94 (0.85–1.04) | 0.89 (0.80–0.99) | 0.83 (0.75–0.93) | 0.85 (0.77–0.95) |                                 |
| Yes                       | 1 (ref) | 0.95 (0.89–1.02) | 0.94 (0.88–1.00) | 0.88 (0.82–0.94) | 0.87 (0.81–0.93) |                                 |
| <b>Hypertension</b>       |         |                  |                  |                  |                  | 0.979                           |
| No                        | 1 (ref) | 0.97 (0.86–1.10) | 0.93 (0.82–1.05) | 0.82 (0.72–0.94) | 0.85 (0.75–0.97) |                                 |
| Yes                       | 1 (ref) | 0.94 (0.88–1.00) | 0.92 (0.86–0.98) | 0.87 (0.81–0.92) | 0.86 (0.81–0.91) |                                 |
| <b>Diabetes</b>           |         |                  |                  |                  |                  | 0.962                           |
| No                        | 1 (ref) | 0.94 (0.88–0.99) | 0.86 (0.81–0.92) | 0.84 (0.79–0.90) | 0.85 (0.80–0.91) |                                 |
| Yes                       | 1 (ref) | 0.99 (0.88–1.11) | 1.13 (1.00–1.27) | 0.91 (0.81–1.03) | 0.90 (0.80–1.01) |                                 |

Model was fully adjusted

**Supplementary Table S8. Sensitivity analyses of the HRs for the associations of diet quality with ESLD and all-cause mortality**

|                     | Exclude the first 2 years of follow-up | Exclude extreme BMIs | Exclude major diet changes | Exclude frequent diet variance |
|---------------------|----------------------------------------|----------------------|----------------------------|--------------------------------|
| ESLD                |                                        |                      |                            |                                |
| Q1                  | 1 (ref)                                | 1 (ref)              | 1 (ref)                    | 1 (ref)                        |
| Q2                  | 0.94 (0.82–1.08)                       | 0.96 (0.84–1.11)     | 1.01 (0.83–1.23)           | 0.97 (0.84–1.11)               |
| Q3                  | 0.82 (0.71–0.95)                       | 0.86 (0.74–1.00)     | 0.87 (0.70–1.07)           | 0.80 (0.69–0.93)               |
| Q4                  | 0.83 (0.72–0.96)                       | 0.85 (0.73–0.98)     | 0.92 (0.75–1.14)           | 0.86 (0.74–0.99)               |
| Q5                  | 0.74 (0.64–0.85)                       | 0.77 (0.66–0.89)     | 0.79 (0.64–0.97)           | 0.79 (0.68–0.91)               |
| All-cause mortality |                                        |                      |                            |                                |
| Q1                  | 1 (ref)                                | 1 (ref)              | 1 (ref)                    | 1 (ref)                        |
| Q2                  | 0.94 (0.89–0.99)                       | 0.96 (0.91–1.01)     | 0.94 (0.87–1.02)           | 0.96 (0.90–1.01)               |
| Q3                  | 0.92 (0.87–0.98)                       | 0.92 (0.87–0.98)     | 0.84 (0.78–0.92)           | 0.93 (0.87–0.98)               |
| Q4                  | 0.85 (0.80–0.91)                       | 0.86 (0.81–0.91)     | 0.85 (0.78–0.92)           | 0.86 (0.81–0.91)               |
| Q5                  | 0.85 (0.80–0.90)                       | 0.85 (0.80–0.90)     | 0.83 (0.76–0.90)           | 0.84 (0.80–0.90)               |

Model was fully adjusted
